# Supplementary material for: Cyclic phosphatidic acid is produced by GDE7 in the ER lumen as a lysophospholipid mediator
Source: Research Square preprint supplement (doi:10.21203/rs.3.rs-2152597/v1), 2022-10-27
Supplement: Supplementary file 1 [file aaf75db828ecdbe99d79f768.xlsx]

## Sheet: Fig1
Figure 1a				Figure 1d				Figure 1d				Figure 1e				Figure 1h				Figure 1h
FS-3 degrading activity(μmol h-1 per mg protein)				LPA-producing activity(μmol h-1 per mg protein)				cPA-producing activity(μmol h-1 per mg protein)				FS-3 degrading activity(μmol h-1 per mg protein)				LPA-producing activity(μmol h-1 per mg protein)				cPA-producing activity(μmol h-1 per mg protein)
	COS-7	COS-7	COS-7		COS-7	COS-7	COS-7		COS-7	COS-7	COS-7		MCF-7	MCF-7	MCF-7		MCF-7	MCF-7	MCF-7		MCF-7	MCF-7	MCF-7
	(–)	m7	h7		(–)	m7	h7		(–)	m7	h7		WT	KO	RE		WT	KO	RE		WT	KO	RE
	0.055529	1.0587	0.675577		0	0.751022	0.413718		0.0671648	5.16788	1.54401		0.234865	0.105018	0.482219		0.345721	0.0358547	0.921354		1.41133	0.470083	6.12643
	0.0655638	0.982372	0.667971		0.00305359	0.761728	0.439258		0.0244651	4.02216	1.54378		0.18234	0.0650007	0.45848		0.35174	0.0920716	1.44157		2.09771	1.32171	7.58084
	0.0358161	0.949934	0.620072		0.00188037	0.668753	0.388474		0.0263099	3.96419	1.4772		0.164922	0.0447186	0.469489		0.550933	0.0808271	1.28543		2.02922	0.877013	10.3459
					0	1.14036	0.742086		0.167839	8.1915	2.6825
mean	0.052303	0.997001	0.65454	mean	0.00123349	0.830466	0.495884	mean	0.0714447	5.33643	1.81187	mean	0.194042	0.0715793	0.470062	mean	0.416131	0.0695845	1.21612	mean	1.84609	0.889601	8.01771
SD	0.015134	0.0558386	0.0300916	SD	0.00150269	0.210732	0.165439	SD	0.0672171	1.98244	0.58127	SD	0.0364103	0.0306834	0.0118797	SD	0.11678	0.029747	0.266943	SD	0.378062	0.425952	2.14338
n	3	3	3	n	4	4	4	n	4	4	4	n	3	3	3	n	3	3	3	n	3	3	3

## Sheet: Fig2
Figure 2a													Figure 2b									Figure 2c																			Figure 2d
LPA (pmol per mg protein)													cPA (pmol per mg protein)									LPA (pmol per mg protein)																			cPA (pmol per mg protein)
	total	total	C16:0	C16:0	C16:1	C16:1	C18:0	C18:0	C18:1	C18:1	C18:2	C18:2		total	total	C16:0	C16:0	C18:0	C18:0	C18:1	C18:1		total	total	total	C16:0	C16:0	C16:0	C16:1	C16:1	C16:1	C18:0	C18:0	C18:0	C18:1	C18:1	C18:1	C18:2	C18:2	C18:2		total	total	total	C16:0	C16:0	C16:0	C18:0	C18:0
	COS-7	COS-7	COS-7	COS-7	COS-7	COS-7	COS-7	COS-7	COS-7	COS-7	COS-7	COS-7		COS-7	COS-7	COS-7	COS-7	COS-7	COS-7	COS-7	COS-7		MCF-7	MCF-7	MCF-7	MCF-7	MCF-7	MCF-7	MCF-7	MCF-7	MCF-7	MCF-7	MCF-7	MCF-7	MCF-7	MCF-7	MCF-7	MCF-7	MCF-7	MCF-7		MCF-7	MCF-7	MCF-7	MCF-7	MCF-7	MCF-7	MCF-7	MCF-7
	(–)	h7	(–)	h7	(–)	h7	(–)	h7	(–)	h7	(–)	h7		(–)	h7	(–)	h7	(–)	h7	(–)	h7		WT	KO	RE	WT	KO	RE	WT	KO	RE	WT	KO	RE	WT	KO	RE	WT	KO	RE		WT	KO	RE	WT	KO	RE	WT	KO
	32.6604	59.3085	11.2867	13.3282	6.44955	9.32854	2.83118	7.99665	9.67432	25.3232	2.41861	3.33195		0	6.04408	0	1.58592	0	1.91064	0	2.54752		99.5158	14.7203	181.728	21.9128	0.792272	47.1556	5.82032	0.768321	6.8342	20.5427	6.91495	70.391	50.2128	5.99934	55.2969	1.02711	0.245461	2.05024		19.7484	6.42512	40.4958	3.41341	0.917874	12.8995	6.50161	2.57005
	35.845	66.7616	11.0583	12.6475	5.81918	10.8228	2.09854	8.32525	14.0713	29.9709	2.79773	4.99515		0	9.94569	0	1.79025	0	4.57499	0	3.58045		64.653	8.40273	203.677	9.1315	1.08382	50.4411	4.01765	0.644794	5.81741	18.2641	3.86853	78.9079	32.5092	2.57901	66.7082	0.730519	0.226583	1.80284		27.4281	8.01068	39.803	8.94467	1.54052	15.5485	2.06988	2.61887
	21.1003	71.245	6.84375	18.8494	1.13952	8.09983	1.14062	6.12577	9.12491	34.8717	2.85153	3.29828		0	6.53025	0	1.35107	0	2.58967	0	2.58952		109.324	10.4757	255.533	21.8642	0.932713	85.5083	4.47201	0.543463	10.5787	35.2811	5.77261	79.2235	46.7127	2.78207	77.5778	0.993823	0.444875	2.64469		33.6107	6.64717	34.3325	7.95465	0.996964	11.1634	9.98357	2.32649
mean	29.8686	65.7717	9.72958	14.9417	4.46942	9.41707	2.02345	7.48256	10.9568	30.0553	2.68929	3.87512	mean	0	7.50667	0	1.57574	0	3.0251	0	2.90583	mean	91.1642	11.1996	213.646	17.6362	0.936267	61.035	4.76999	0.652193	7.74343	24.696	5.5187	76.1741	43.1449	3.78681	66.5277	0.917152	0.30564	2.16593	mean	26.929	7.02766	38.2104	6.77091	1.15178	13.2038	6.18502	2.50514
SD	7.75868	6.02953	2.50181	3.40124	2.90095	1.36365	0.847778	1.18644	2.71115	4.77484	0.235956	0.970115	SD	0	2.12619	0	0.219768	0	1.38452	0	0.584619	SD	23.4773	3.22041	37.8989	7.36529	0.145805	21.2581	0.937553	0.112611	2.50749	9.23752	1.539	5.01082	9.37559	1.9188	11.1415	0.162484	0.12095	0.432683	SD	6.94464	0.85853	3.37623	2.94951	0.338965	2.20834	3.96633	0.156627
n	3	3	3	3	3	3	3	3	3	3	3	3	n	3	3	3	3	3	3	3	3	n	3	3	3	3	3	3	3	3	3	3	3	3	3	3	3	3	3	3	n	3	3	3	3	3	3	3	3
[truncated: 4 more columns]

## Sheet: Fig5
Figure 5c						Figure 5e						Figure 5e
FS-3 degrading activity(μmol h-1 per mg protein)						LPA-producing activity(μmol h-1 per mg protein)						cPA-producing activity(μmol h-1 per mg protein)
	COS-7	COS-7	COS-7	COS-7	COS-7		COS-7	COS-7	COS-7	COS-7	COS-7		COS-7	COS-7	COS-7	COS-7	COS-7
	(–)	WT	F227E	Y238K	F227E/Y238K		(–)	WT	F227E	Y238K	F227E/Y238K		(–)	WT	F227E	Y238K	F227E/Y238K
	0.0306363	0.136075	0.0676294	0.0449773	0.0308744		0.0148975	0.0970693	0.0355959	0	0		0.0307097	0.276136	0.201756	0	0
	0.0304585	0.134545	0.0761609	0.0379549	0.0290668		0.0258024	0.118263	0.0302665	0	0		0	0.244698	0.148543	0	0
	0.0448053	0.138835	0.0683327	0.0439278	0.0244395		0.000405017	0.0909664	0.0291541	0	0		0	0.296003	0.267809	0.0718942	0
mean	0.0353001	0.136485	0.0707077	0.0422867	0.0281269	mean	0.0137016	0.1021	0.0316722	0	0	mean	0.0102366	0.272279	0.206036	0.0239647	0
SD	0.00823227	0.00217397	0.0047357	0.0037879	0.00331878	SD	0.0127409	0.0143268	0.00344329	0	0	SD	0.0177302	0.0258689	0.0597481	0.0415081	0
n	3	3	3	3	3	n	3	3	3	3	3	n	3	3	3	3	3

## Sheet: Fig6
Figure 6
CD36(fold over GAPDH×10-3)				CYP27A1(fold over GAPDH×10-4)				CSF1(fold over GAPDH×10-4)				PPARG(fold over GAPDH×10-3)
	MCF-7	MCF-7	MCF-7		MCF-7	MCF-7	MCF-7		MCF-7	MCF-7	MCF-7		MCF-7	MCF-7	MCF-7
	WT	KO	RE		WT	KO	RE		WT	KO	RE		WT	KO	RE
	0.622061	2.78652	1.36892		0.0789543	0.441245	0.108041		0.456878	1.39217	0.524141		1.88622	2.59016	2.05916
	0.708986	2.91148	1.39938		0.143757	0.690273	0.167841		0.471299	1.53149	0.596788		2.1201	2.7269	2.44267
	0.735021	3.07032	1.45877		0.160423	0.762239	0.289364		0.488086	1.59042	0.650458		2.5745	2.81808	2.5626
	0.853766	3.09774	1.67716		0.183387	0.847434	0.344515		0.519088	1.67905	0.731072		2.65247	2.86075	2.92095
mean	0.729958	2.96651	1.47606	mean	0.14163	0.685298	0.22744	mean	0.483838	1.54828	0.625615	mean	2.30832	2.74897	2.49635
SD	0.0956303	0.1454	0.13916	SD	0.0448316	0.174924	0.10855	SD	0.0267374	0.120456	0.0873046	SD	0.366463	0.119695	0.355288
n	4	4	4	n	4	4	4	n	4	4	4	n	4	4	4
